# Supplementary material for: GC-MS Profiling of Volatile Components in Different Fermentation Products of Cordyceps Sinensis Mycelia
Source: PubMed Central journal article supplement (PMC6151420; doi:10.3390/molecules22101800), 2017-10-24
Supplement: molecules-22-01800-s001.pdf [file molecules-22-01800-s001.pdf]

## Supplementary materials

# GC-MS Profiling of Volatile Components in Different Fermentation Products of *Cordyceps Sinensis* Mycelia

Hongyang Zhang <sup>1,2</sup>, Yahui Li <sup>1</sup>, Jianing Mi <sup>3</sup>, Min Zhang <sup>2</sup>, Yuerong Wang <sup>1</sup>, Zhihong Jiang <sup>3</sup> and Ping Hu <sup>1,\*</sup>

<sup>1</sup> School of Chemistry and Molecular Engineering, East China University of Science and Technology, Shanghai 200237, China; hongyang\_zhang@ecust.edu.cn (H.Z.); yahuili1990@163.com (Y.L.); wangyuerong@ecust.edu.cn (Y.W.)

<sup>2</sup> Shanghai Key Laboratory of New Drug Design, School of Pharmacy, East China University of Science and Technology, Shanghai 200237, China; zhangm@ecust.edu.cn

<sup>3</sup> State Key Laboratory of Quality Research in Chinese Medicine, Macau Institute for Applied Research in Medicine and Health, Macau University of Science and Technology, Taipa, Macau 999078, China; mjnrhw@hotmail.com (J.M.); zhjiang@must.edu.mo (Z.J.)

\* Correspondence: huping@ecust.edu.cn; Tel.: +86-021-6425-2844

## Contents

Figure S1. <sup>1</sup>H-NMR spectrum of massoia lactone (No. 48 in Table 2).

Figure S2. <sup>13</sup>C-NMR spectrum of massoia lactone (No. 48 in Table 2).

Characterization data of massoia lactone:

Colorless oil (compound purity > 95%); <sup>1</sup>H NMR (400 MHz)  $\delta$  6.96-6.72 (m, 1H, CH=CHCH<sub>2</sub>), 6.02 (d,  $J$  = 9.9 Hz, 1H, CH=CHCH<sub>2</sub>), 4.53-4.20 (m, 1H, CH), 2.41-2.23 (m, 2H, CH=CHCH<sub>2</sub>), 1.88-1.33 (m, 8H, 4CH<sub>2</sub>), 0.90 (t,  $J$  = 6.7 Hz, 3H, CH<sub>3</sub>); <sup>13</sup>C NMR (100 MHz)  $\delta$  164.41 (C=O), 145.10 (CH=CH), 121.02 (CH=CH), 77.82 (CH<sub>2</sub>CHO), 34.56 (CH=CHCH<sub>2</sub>), 31.27 (CH<sub>2</sub>), 29.13 (CH<sub>2</sub>), 24.23 (CH<sub>2</sub>), 22.23 (CH<sub>2</sub>), 13.72 (CH<sub>2</sub>).

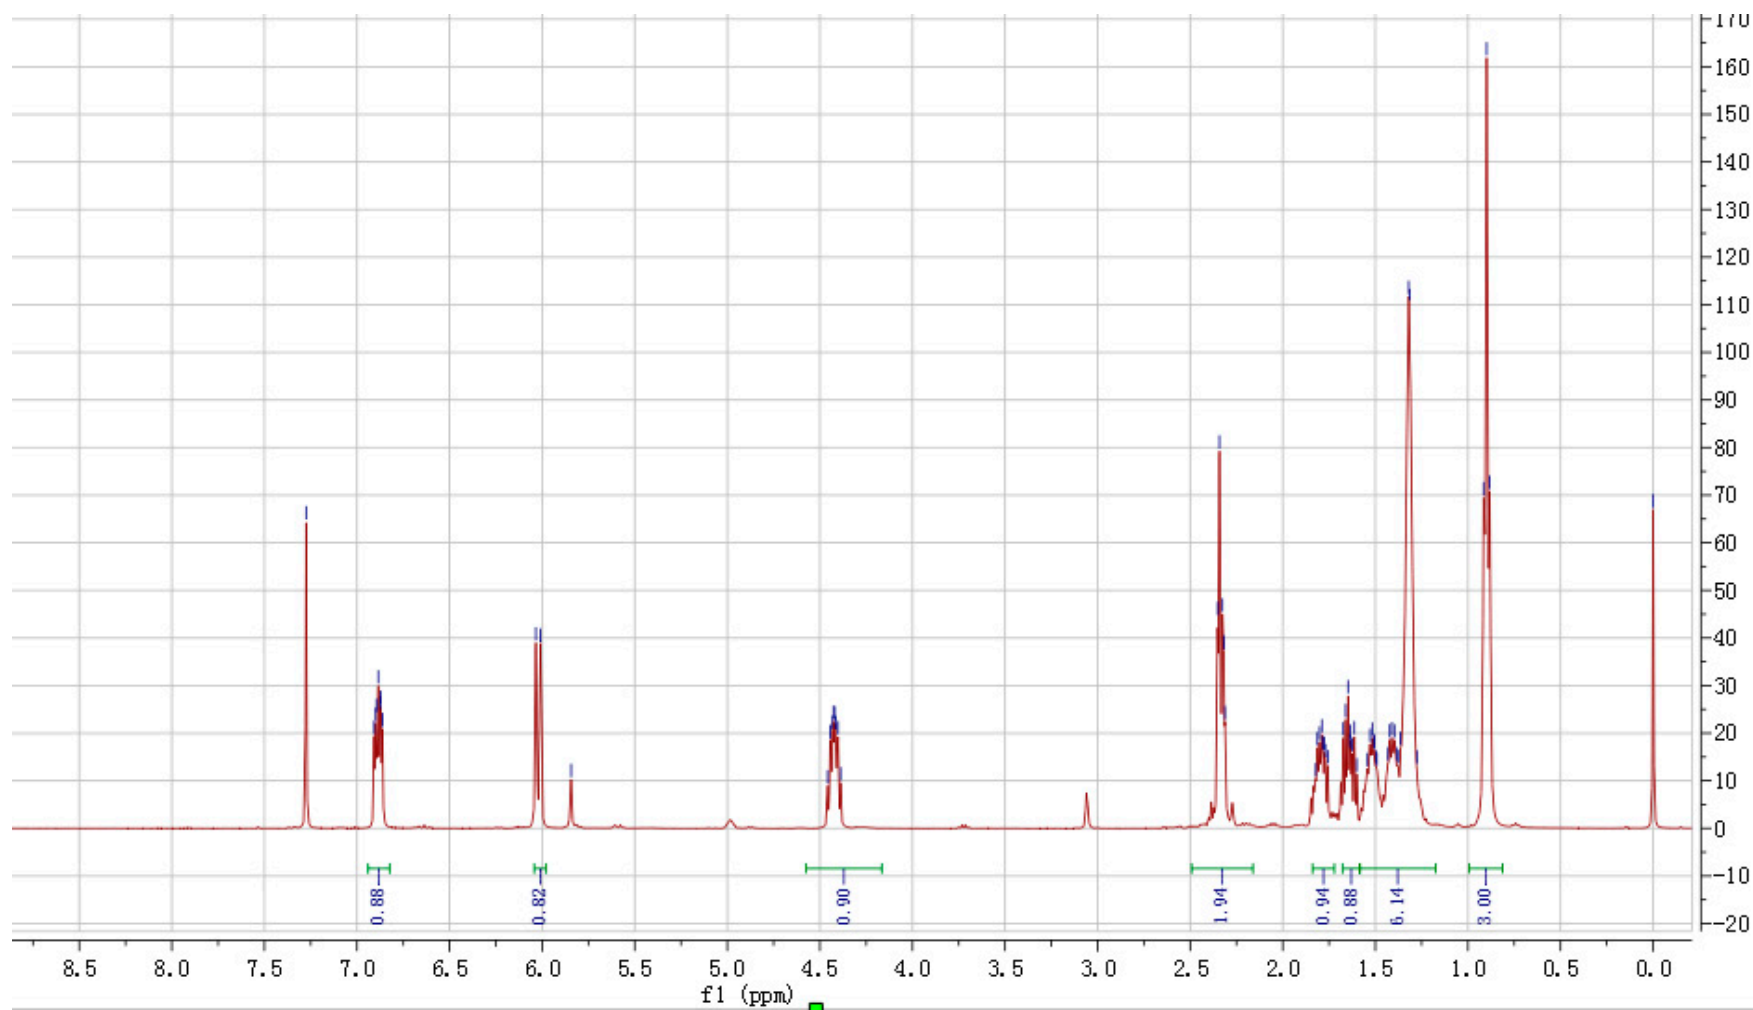

1

2

Figure S1. <sup>1</sup>H-NMR spectrum of massoia lactone (No. 48 in Table 2).

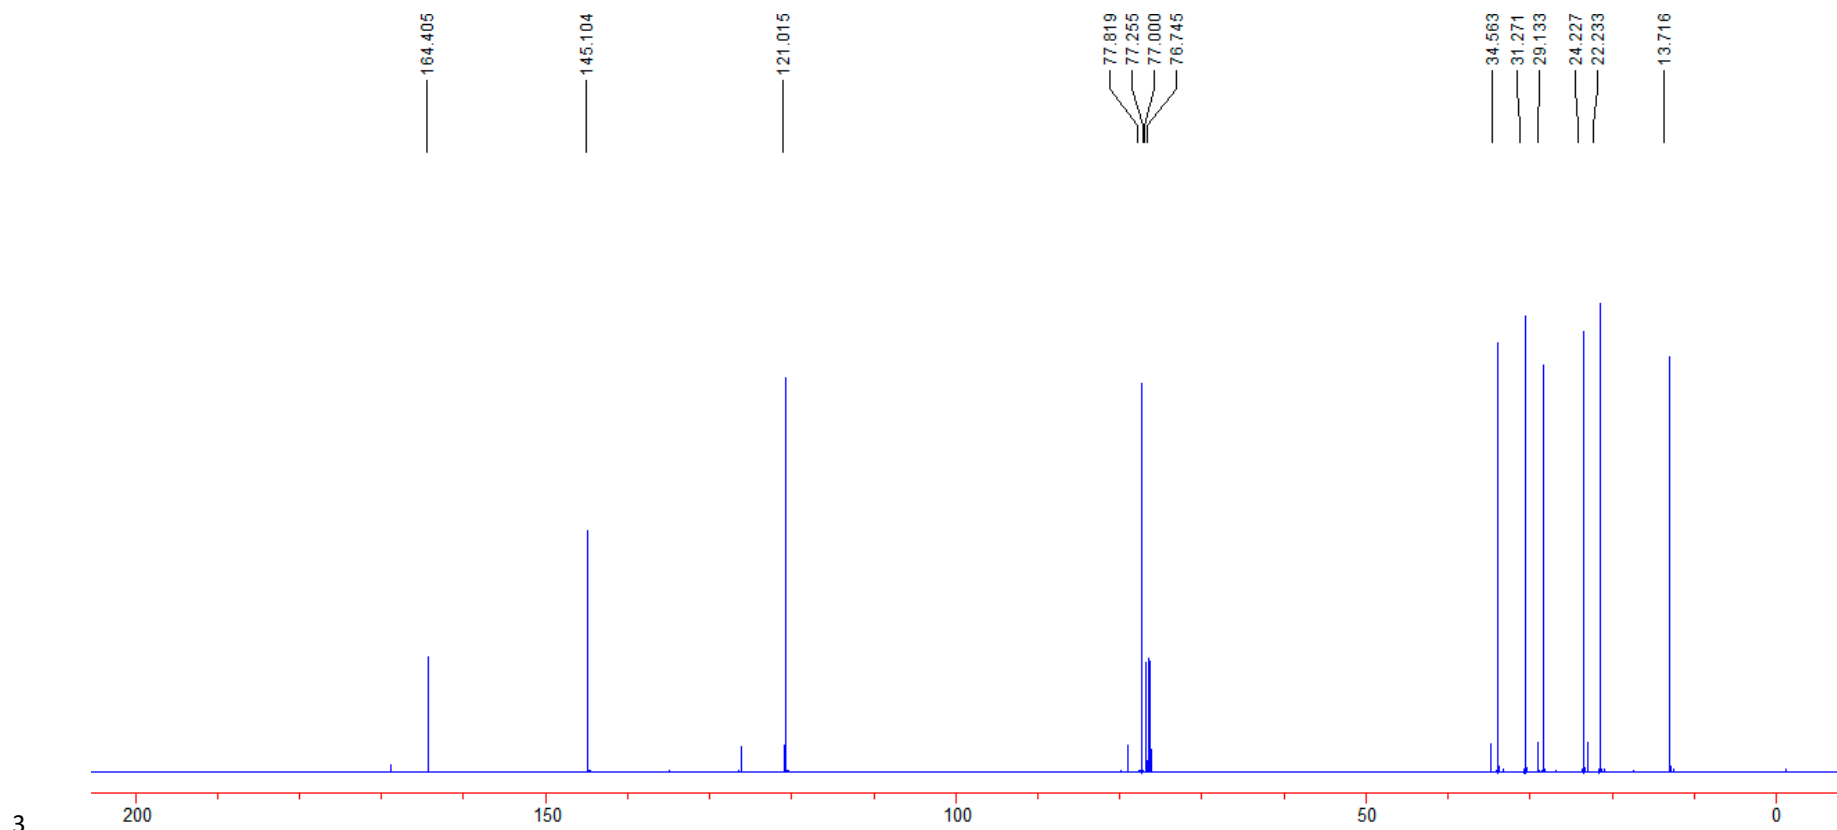

3

4

Figure S2.  $^{13}\text{C}$ -NMR spectrum of massoia lactone (No. 48 in Table 2).
